# Supplementary material for: Diverse antimalarials from whole-cell phenotypic screens disrupt malaria parasite ion and volume homeostasis
Source: PubMed Central journal article supplement (PMC5995868; doi:10.1038/s41598-018-26819-1), 2018-06-11
Supplement: 41598_2018_26819_MOESM1_ESM.pdf [file 41598_2018_26819_MOESM1_ESM.pdf]

## Supplementary Information

### **Diverse antimalarials from whole-cell phenotypic screens disrupt malaria parasite ion and volume homeostasis**

Adelaide S. M. Dennis, James E. O. Rosling, Adele M. Lehane\*, Kiaran Kirk\*

\*Corresponding authors (email: [adele.lehane@anu.edu.au](mailto:adele.lehane@anu.edu.au), [kiaran.kirk@anu.edu.au](mailto:kiaran.kirk@anu.edu.au))

**Supplementary Table S1.** Pathogen Box compounds that caused a cytosolic acidification in isolated BCECF-loaded parasites when added at 1  $\mu\text{M}$  ( $n = 1$ ), and/or had an effect on isolated parasite volume when added at 5  $\mu\text{M}$  ( $n = 2$ ). Compounds that caused an effect on  $[\text{Na}^+]_{\text{cyt}}$  in isolated SBFI-loaded parasites are listed in Table 1.

| Compound Identifier    | Location in the Pathogen Box | Anti-pathogen activity             | Caused a decrease in $\text{pH}_{\text{cyt}}$ | Change in parasite volume (%) |
|------------------------|------------------------------|------------------------------------|-----------------------------------------------|-------------------------------|
| MMV676501              | Plate A, A9                  | Tuberculosis                       | Yes                                           | -4                            |
| MMV102872              | Plate A, B10                 | Tuberculosis                       | Yes                                           | -8                            |
| MMV676477              | Plate A, B11                 | Tuberculosis                       | Yes                                           | -4                            |
| MMV676558              | Plate A, G7                  | Tuberculosis                       | Yes                                           | -                             |
| MMV688991              | Plate B, G3                  | Reference compound<br>Nitazoxanide | Yes                                           | -6                            |
| MMV687807              | Plate C, F8                  | Tuberculosis <sup>a</sup>          | Yes                                           | -4                            |
| MMV659004              | Plate D, E5                  | Kinetoplastids <sup>b</sup>        | Yes                                           | +3                            |
| MMV688345              | Plate E, D7                  | Toxoplasmosis                      | Yes                                           | -                             |
| MMV021013              | Plate E, G4                  | Tuberculosis                       | Yes                                           | -                             |
| MMV658988              | Plate E, G8                  | Kinetoplastids <sup>b</sup>        | Yes                                           | -                             |
| MMV002817              | Plate B, E6                  | Onchocerciasis                     | No                                            | -20                           |
| MMV019993              | Plate E, A11                 | Malaria                            | No                                            | -13                           |
| MMV407834              | Plate E, E9                  | Malaria                            | No                                            | -12                           |
| MMV020512              | Plate B, A10                 | Malaria                            | No                                            | -10                           |
| MMV687812              | Plate D, F11                 | Tuberculosis                       | No                                            | -7                            |
| MMV688978              | Plate E, H5                  | Reference compound<br>Auranofin    | No                                            | -7                            |
| MMV676476              | Plate A, F7                  | Tuberculosis                       | No                                            | -5                            |
| MMV676412              | Plate A, A11                 | Tuberculosis                       | No                                            | -5                            |
| MMV153413              | Plate E, E11                 | Tuberculosis                       | No                                            | -5                            |
| MMV676524              | Plate E, C10                 | Tuberculosis                       | No                                            | -4                            |
| MMV012074              | Plate B, B2                  | Tuberculosis                       | No                                            | -3                            |
| MMV011903              | Plate B, A7                  | Malaria                            | No                                            | +3                            |
| MMV085210 <sup>c</sup> | Plate B, F11                 | Malaria                            | No                                            | +3                            |
| MMV020623 <sup>c</sup> | Plate B, A9                  | Malaria                            | No                                            | +4                            |
| MMV001059 <sup>c</sup> | Plate D, G3                  | Malaria                            | No                                            | +4                            |
| MMV020136 <sup>c</sup> | Plate B, C7                  | Malaria                            | No                                            | +5                            |
| MMV020710 <sup>c</sup> | Plate B, C8                  | Malaria                            | No                                            | +5                            |
| MMV000858 <sup>c</sup> | Plate B, G8                  | Malaria                            | No                                            | +5                            |
| MMV020520 <sup>c</sup> | Plate B, D8                  | Malaria                            | No                                            | +6                            |
| MMV006239 <sup>c</sup> | Plate B, G7                  | Malaria                            | No                                            | +6                            |
| MMV020081 <sup>c</sup> | Plate D, D3                  | Malaria                            | No                                            | +6                            |
| MMV020391 <sup>c</sup> | Plate B, H9                  | Malaria                            | No                                            | +11                           |

<sup>a</sup> The anti-tuberculosis compound MMV687807 caused a decrease in parasite  $\text{pH}_{\text{cyt}}$  that was similar in magnitude to that seen for the control compound concanamycin A. All other  $\text{pH}$ -disrupting compounds listed here caused an acidification of the parasite cytosol that was less pronounced than that observed for concanamycin A.

<sup>b</sup> Compounds MMV659004 and MMV658988 are 2-Pyridyl-4-aminopyrimidines with asexual stage antiplasmodial activity<sup>1</sup>.

<sup>c</sup> These compounds caused an increase in  $[\text{Na}^+]_{\text{cyt}}$  and are also listed in Table 1.

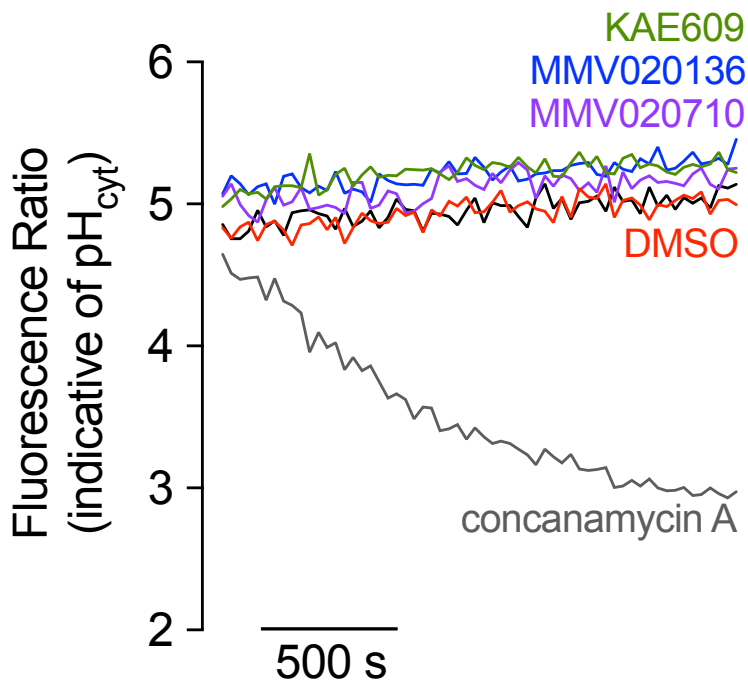

**Supplementary Figure S1. Trace showing Pathogen Box compounds causing a slight alkalinisation of the parasite cytosol in the 96-well plate assay.** Trace showing the effects of concanamycin A (100 nM, grey trace), KAE609 (50 nM, green trace), 0.1% v/v DMSO (vehicle control, red trace) on pH<sub>cyt</sub> in isolated BCECF-loaded parasites. Pathogen Box compounds, represented by a blue trace for MMV020136 and a purple trace for MMV020710 (each at a concentration of 1 μM) caused an increase in parasite [Na<sup>+</sup>]<sub>cyt</sub>, whereas the compound represented by the black trace (MMV020517, 1 μM) had no effect on parasite [Na<sup>+</sup>]<sub>cyt</sub>. Parasites were suspended in physiological saline at 1-2 × 10<sup>7</sup> cells/mL. Fluorescence was measured using the Tecan fluorescence plate reader.

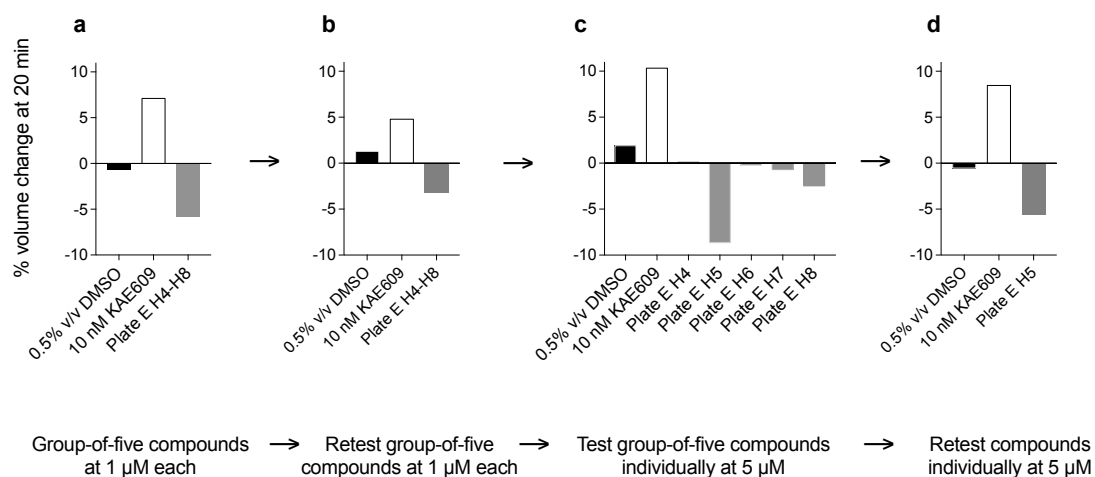

### Supplementary Figure S2. Screening strategy used to identify Pathogen Box

**compounds that have an effect on parasite volume.** (a) Isolated parasites were suspended in physiological saline and exposed either to the vehicle control (0.5% v/v DMSO), to KAE609 (10 nM in DMSO) or to groups of five Pathogen Box compounds, each at a concentration of 1  $\mu$ M. Parasite volume was measured at t = 0 and 20 min using a Coulter Multisizer 4, and the % volume change at 20 min thereby determined. (b) Groups of five compounds that caused a volume change of  $\geq 3\%$  when added to isolated parasites, each at a concentration of 1  $\mu$ M (in (a)) were tested a second time. (c) The groups of five compounds that caused a volume change of  $\geq 3\%$  in both of the two replicates (i.e. in (a) and (b)) were tested individually, each at a concentration of 5  $\mu$ M. (d) Each individual compound found to disrupt parasite volume by  $\geq 3\%$  at 5  $\mu$ M (in (c)) was tested a second time to confirm the result.

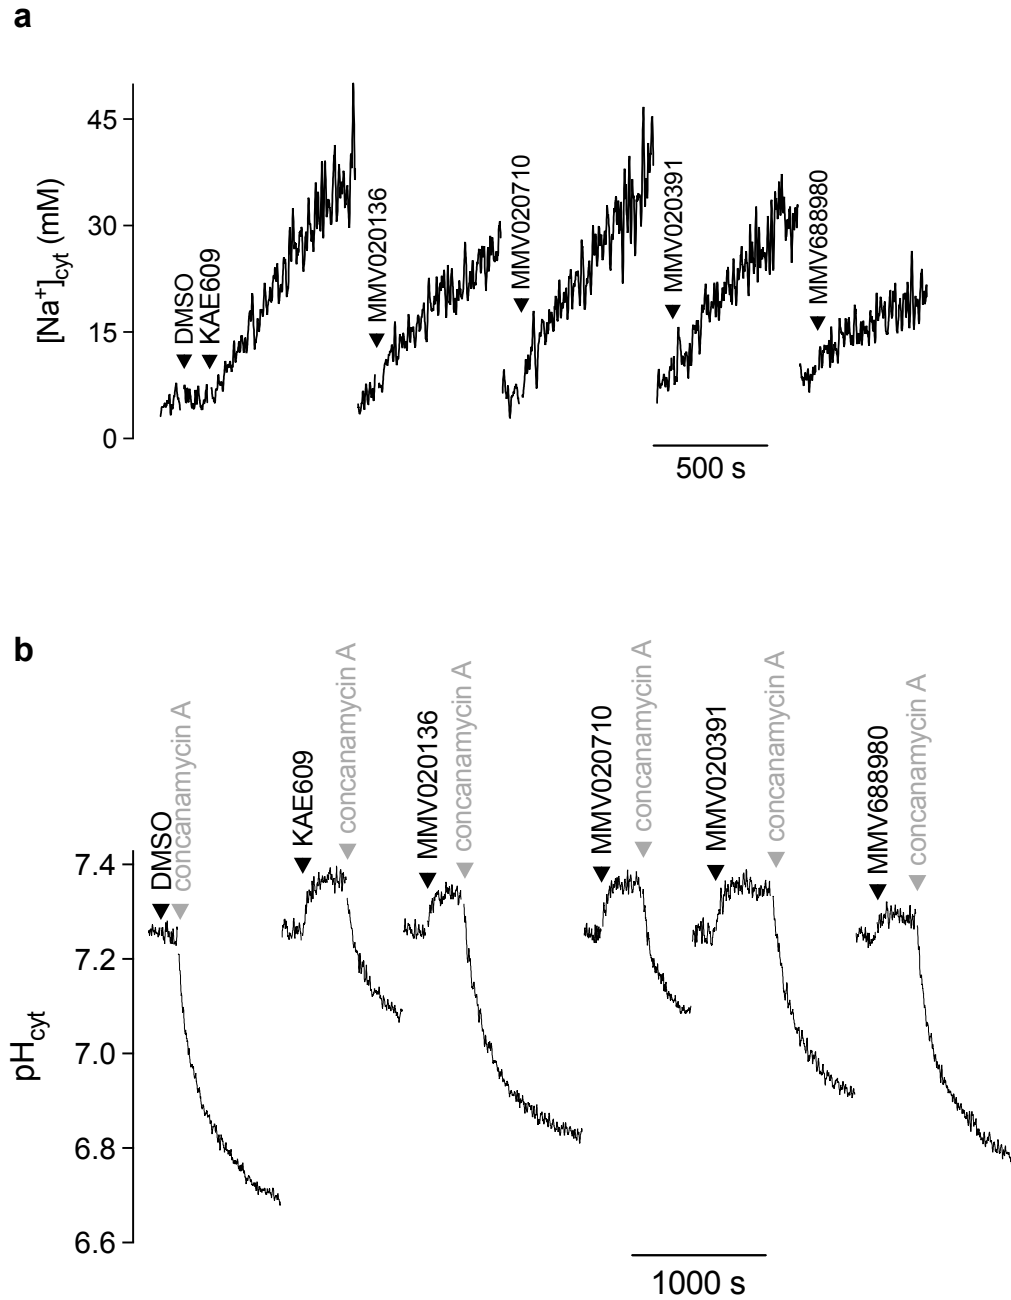

**Supplementary Figure S3. The effect of representative Pathogen Box compounds (each tested at 1  $\mu$ M) on the  $[Na^+]_{cyt}$  and  $pH_{cyt}$  of asexual blood-stage 3D7 parasites. (a) Traces showing the effects of selected compounds on  $[Na^+]_{cyt}$  in isolated SBFI-loaded parasites. DMSO (0.1% v/v), added as a solvent control, had no effect on parasite  $[Na^+]_{cyt}$ , whereas the addition of KAE609 (50 nM) caused an immediate-onset increase in  $[Na^+]_{cyt}$ . The addition of the Pathogen Box compounds**

MMV020136, MMV020710, MMV020391 or MMV688980 (each added at a concentration of 1  $\mu\text{M}$ ) caused parasite  $[\text{Na}^+]_{\text{cyt}}$  to increase. The results shown are from a single experiment. **(b)** Representative traces showing the effects of selected compounds on  $\text{pH}_{\text{cyt}}$  in isolated BCECF-loaded parasites. The addition of concanamycin A (100 nM; grey arrows) caused the cytosol to acidify to a pH below that of the extracellular saline (pH 7.1), whereas the addition of DMSO (0.1% v/v; solvent control) had no effect on  $\text{pH}_{\text{cyt}}$ . KAE609 (10 nM in DMSO) caused the cytosol to alkalinise, and reduced the acidification seen in response to the addition of concanamycin A. The Pathogen Box compounds - MMV020136, MMV020710, MMV020391, and MMV688980 (each tested at 1  $\mu\text{M}$ ) - had a similar effect, causing a cytosolic alkalinisation and reducing the concanamycin A-induced acidification. The results shown are from a single experiment and are representative of those obtained in two independent experiments. For **(a)** and **(b)** parasites were suspended in physiological saline at  $1-2 \times 10^7$  cells/mL, and fluorescence intensity was measured using a PerkinElmer LS 50B fluorimeter.

## Reference

1. Duffy, S., Sykes, M. L., Jones, A. J., Shelper, T. B., Simpson, M. *et al.* Screening the Medicines for Malaria Venture Pathogen Box across multiple pathogens reclassifies starting points for open-source drug discovery. *Antimicrob Agents Chemother* **61**, e00379-17 (2017).
